# Supplementary material for: Synthesis and catalytic activity of organic–inorganic hybrid Ti-SBA-15 materials
Source: Royal Society of Chemistry journal article supplement (doi:10.1039/b610868g), 2006-11-24
Supplement: b610868g.pdf [file b610868g.pdf]

## Synthesis and catalytic activity of organic-inorganic hybrid Ti-SBA-15 materials

Juan A. Melero,<sup>\*a</sup> Jose Iglesias,<sup>a</sup> Jesus M. Arsuaga,<sup>a</sup> Javier Sainz-Pardo,<sup>a</sup> Pilar de Frutos<sup>b</sup> and Sandra Blazquez<sup>b</sup>

<sup>a</sup> Department of Chemical and Environmental Technology,  
Rey Juan Carlos University, C/ Tulipan s/n, 28933 Móstoles, Madrid, Spain.

<sup>b</sup> Repsol-YPF Research Center  
28931 Móstoles, Madrid, Spain

### Supporting Information

**Figure ESI-1.** FTIR spectra and expansion in the Cp region, recorded for the Titanium containing mesostructured samples.

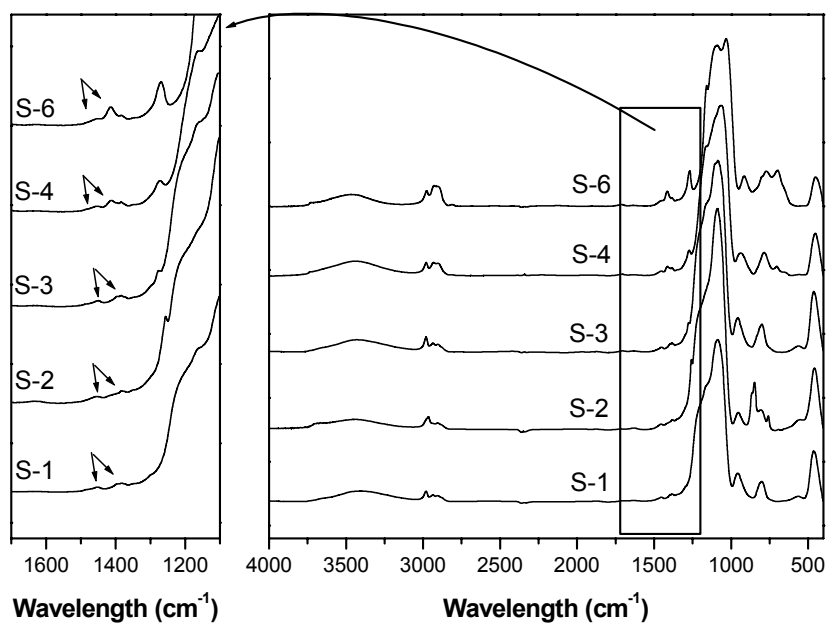

**Figure ESI-2.** Comparison of FTIR spectra recorded for sample S-4, before (as made material) and after ethanol washing step (extracted sample).

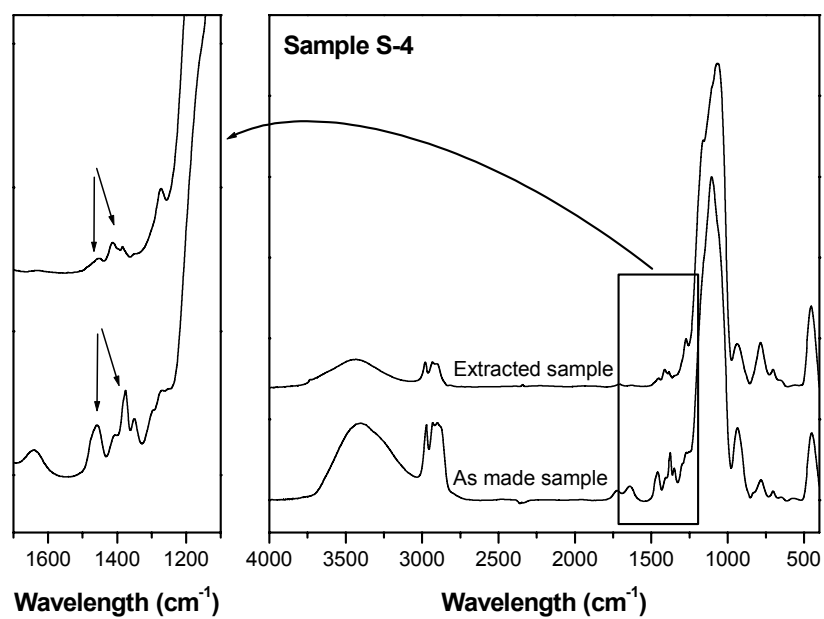

**Figure ESI-3.** t-plot curves and linear fitting in the micropore region achieved for PMO-samples with different organic content.

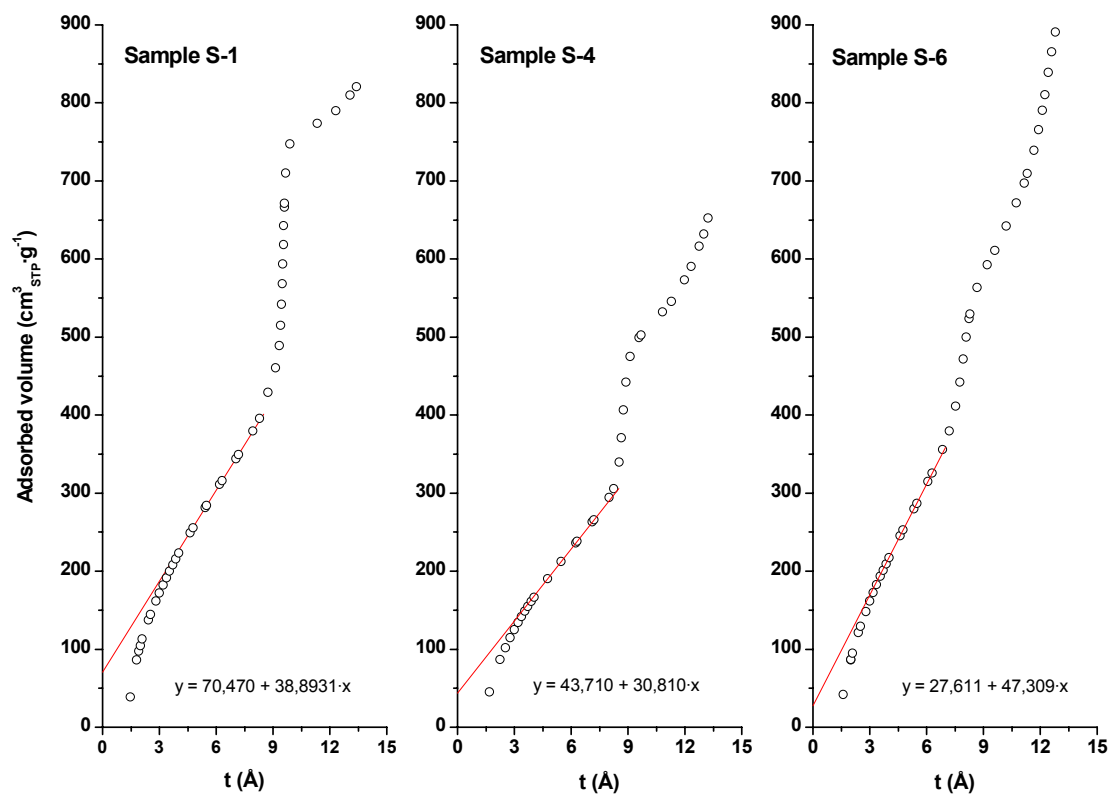

**Figure ESI-4.** Thermogravimetric experiments and weight loss assignation for titanium containing PMO samples with different organic contents.

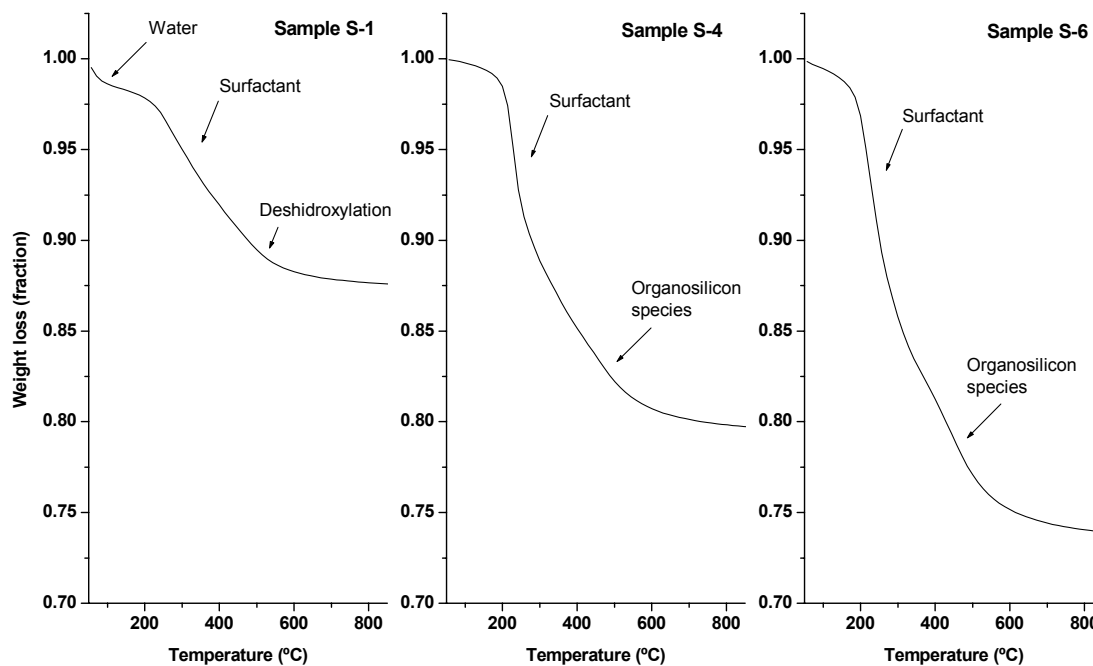

**Table ESI-1.** Chemical analysis performed on sample S-4, before and after washing with ethanol

| <b>Sample S-4</b>          | <b>Ti in Sample (%)</b> | <b>Organic (%)</b> | <b>Ti/SiO<sub>2</sub> (%)<sup>a</sup></b> | <b>Incorporation efficiency (%)<sup>b</sup></b> |
|----------------------------|-------------------------|--------------------|-------------------------------------------|-------------------------------------------------|
| <b>As Made</b>             | 0.175                   | 59.3               | 0.430                                     | 9.55                                            |
| <b>Extracted with EtOH</b> | 0.205                   | 20.2               | 0.257                                     | 5.71                                            |

<sup>a</sup> Titanium content referred to silica basis. <sup>b</sup> Incorporation efficiency calculated regarding to the initial titanium content in the synthesis gel.
